# Supplementary material for: Multiple microRNAs regulate human FOXP2 gene expression by targeting sequences in its 3′ untranslated region
Source: PubMed Central journal article supplement (PMC4189591; doi:10.1186/s13041-014-0071-0), 2014-10-01
Supplement: 13041_2014_71_MOESM1_ESM.pdf [file 13041_2014_71_MOESM1_ESM.pdf]

## Additional Figure S1

### Primers used for human *FOXP2* 3'-UTR cloning

#### Fragment 1

forward primer: 5'-CAGCGATCGCGAACTGACTTGTGAAACCTCAGCG-3'

(a Sgf1 restriction site is underlined)

reverse primer: 5'-CTCGCAGTTACTTCCAGTCCCTCAAAGCC-3'

#### Fragment 2

forward primer: 5'-GTCTTTGGGTCATGATCAACGAACCGG-3'

reverse primer: 5'-TATGTTTAAACTTTATAAATGGGTCAAAAAGAATTAGA-3'

(a PmeI restriction site is underlined)

### Primers used for qRT-PCR

#### FOXP2:

forward primer: 5'-CCACGAAGACCTCAATGGTT-3'

reverse primer: 5'-TCACGCTGAGGTTTCACAAG-3'

#### $\beta$ -Actin

forward primer: 5'-CTACAATGAGCTGCGTGTGGC-3'

reverse primer: 5'-CAGGTCCAGACGCAGGATGGC-3'

### siFOXP2 sequence used in transfection

siFOXP2: 5'-ATGGAAGACAATGGCATTAAA-3'

### Primers used in miRNA binding sites mutagenesis

#### let7-a bs1-1<sup>#</sup>

5'-CCCAAAGGCTTTCTGAAAGCTTCAAGCTCTGCAAAAAAAAAAAAAAAAAAGAAAAA-3'

5'-TTTTTCTTTTTTTTTTTTTTGCAGAGCTTGAAGCTTTCAGAAAGCCTTTTGGG-3'

#### let7-a bs1-2<sup>#</sup>

5'-CAAAGGCTTTCTGAAAGCTTCAAGCAC TGCAAAAAAAAAAAAAAAAAAGAAAAAAAAA-3'

5'-TTTTTTTTTCTTTTTTTTTTTTTTGCAGTGCTTGAAGCTTTCAGAAAGCCTTTTG-3'

#### let7-a bs2

5'-CTAGGATTTGAAAGAAAAGTCAAGCAC TTAACACCAGGGAGTTATCAGA-3'

5'-TCTGATAACTCCCTGGTGTTAAGTGCTTGACAGTTTTCTTTCAAATCCTAG-3'

#### miR-9 bs1

5'-CAGTCAAAGGCTACAGCTGCAA CCTAAGGCCAACTCTAACCATGGC-3'

5'-GCCATGGTTAGAGTTGGCCTTAGGTTGCAGCTGTAGCCTTTGACTG-3'

#### miR-9 bs2-1<sup>#</sup>

5'-GTCCATGGTATTTATTTTCAGTCAA GCAAAAGTTACATATAATTCTGCCTCTG-3'

5'-CAGAGGCAGAATTATATGTAAC TTTTGCTTGACTGAAAATAAATACCATGGAC-3'

miR-9 bs2-2#

5'-GTATTTATTTTCAGTCAA **GCAAACG**TTACATATAATTCTGCCTCTGC-3'

5'-GCAGAGGCAGAATTATATGTAACGTTTGCTTGACTGAAAATAAATAC-3'

miR-129-5p bs1-1#

5'-AAGGCTTTCTGAAAGCTTCTACCTCT **GGAAAAA**AAAAAAAAAGAAAAAAAAAAAAAAG-3'

5'-CTTTTTTTTTTTTTCTTTTTTTTTTTTTCCAGAGGTAGAAGCTTTCAGAAAGCCTT-3'

miR-129-5p bs1-2#

5'-GGCTTTCTGAAAGCTTCTACCTCT **GGATAAA**AAAAAAAAAGAAAAAAAAAAAAAAGAA-3'

5'-TTCTTTTTTTTTTTTTCTTTTTTTTTTTATCCAGAGGTAGAAGCTTTCAGAAAGCC-3'

miR-129-5p bs2

5'-CATGAACACTTGGCATATCTTACTTA **CGAAAAA**AGAAGGATGTACATTTTACTA-3'

5'-TAGTAAAATGTACATCCTTCTTTTTTTCGTAAGTAAGATATGCCAAGTGT-3'
